# Supplementary material
Source: PubMed Central journal article supplement (PMC5241389)

A)

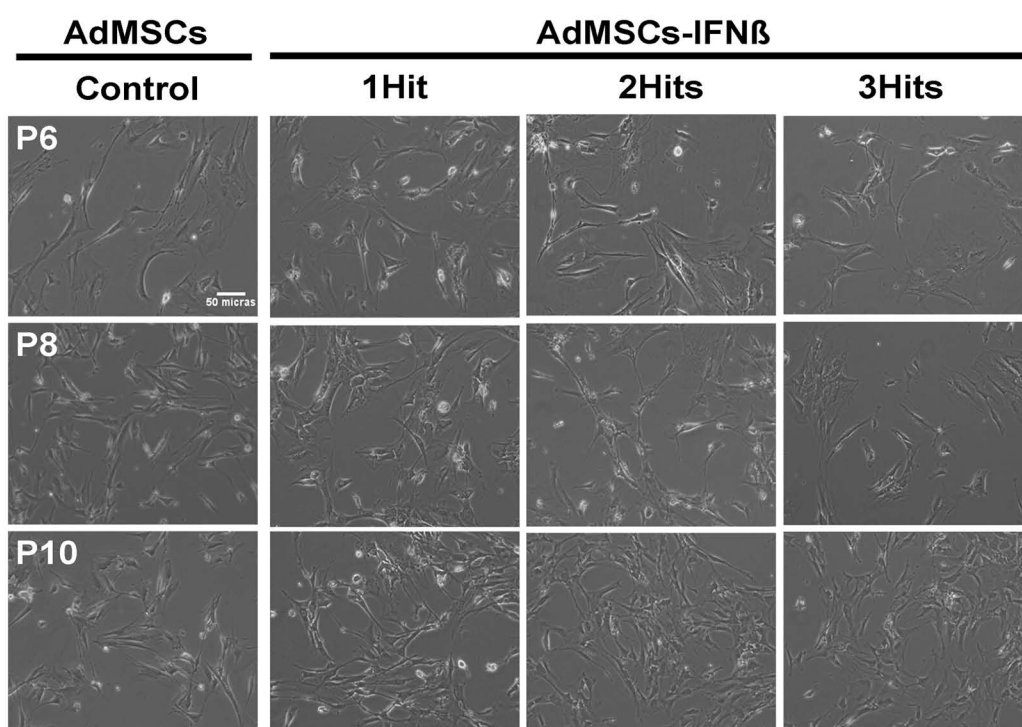

B)

| Passages | AdMSCs          | AdMSCs-IFN $\beta$ |                 |                 |
|----------|-----------------|--------------------|-----------------|-----------------|
|          |                 | 1Hit               | 2Hits           | 3Hits           |
| P6       | 34,8 $\pm$ 5,1  | 30,69 $\pm$ 21,29  | 49,8 $\pm$ 27,4 | 29,9 $\pm$ 13,9 |
| P7       | 31,5 $\pm$ 11,3 | 31,46 $\pm$ 6,59   | 30,4 $\pm$ 3,4  | 26,9 $\pm$ 3,9  |
| P8       | 20,7 $\pm$ 1,39 | 28,54 $\pm$ 2,55   | 20,9 $\pm$ 3,1  | 26 $\pm$ 6,8    |
| P9       | 20,8 $\pm$ 3,4  | 25,17 $\pm$ 2,43   | 26,6 $\pm$ 8,8  | 24,4 $\pm$ 4,8  |
| P10      | 22 $\pm$ 4      | 27,55 $\pm$ 1,41   | 26,1 $\pm$ 9,9  | 22,4 $\pm$ 11,8 |

C)

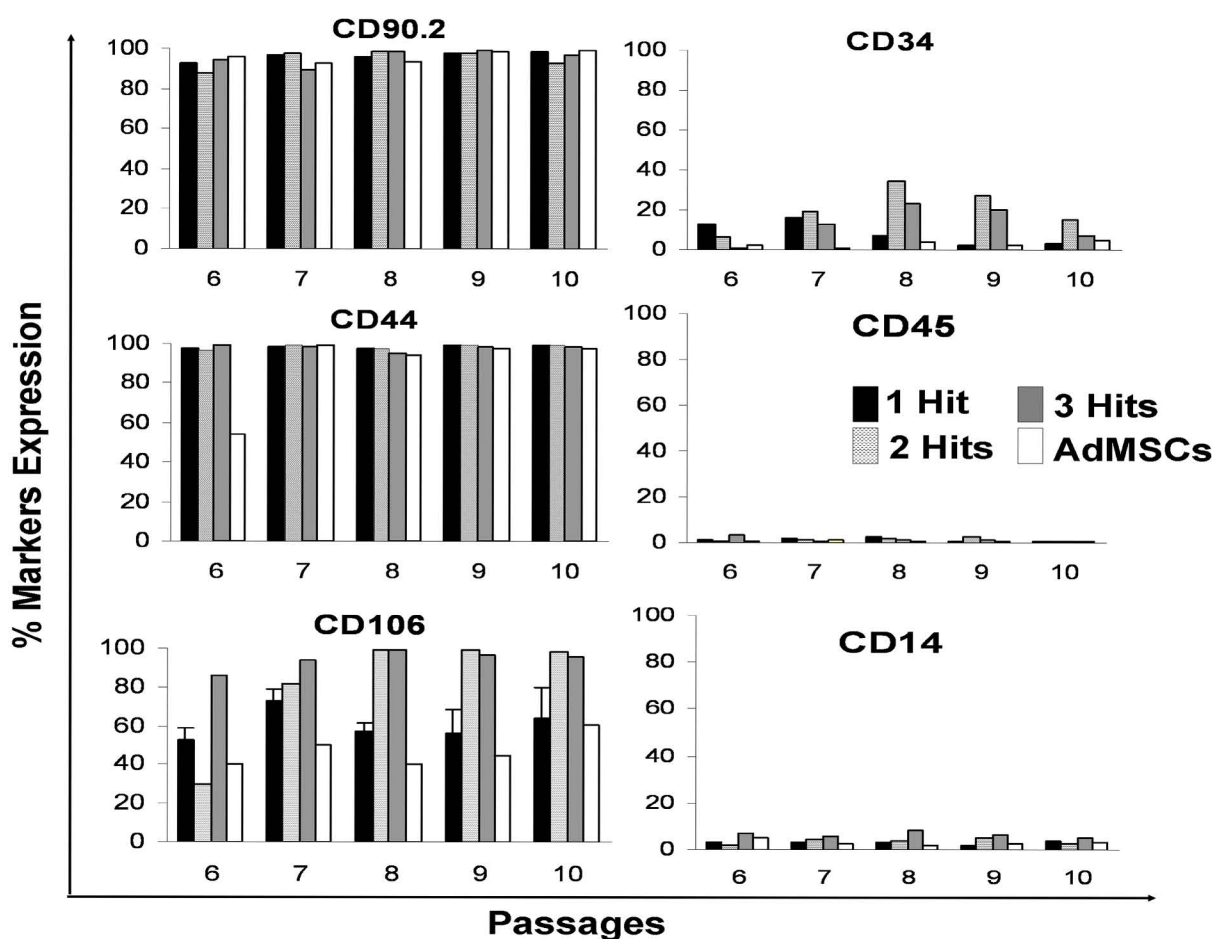

Supplement: BPH-174-238-s001.pdf [file BPH-174-238-s001.pdf]
