# Supplementary material
Source: PubMed Central journal article supplement (PMC5241389)

### A) Histopathological analysis after therapies in RR-EAE mice (autologous transplants)

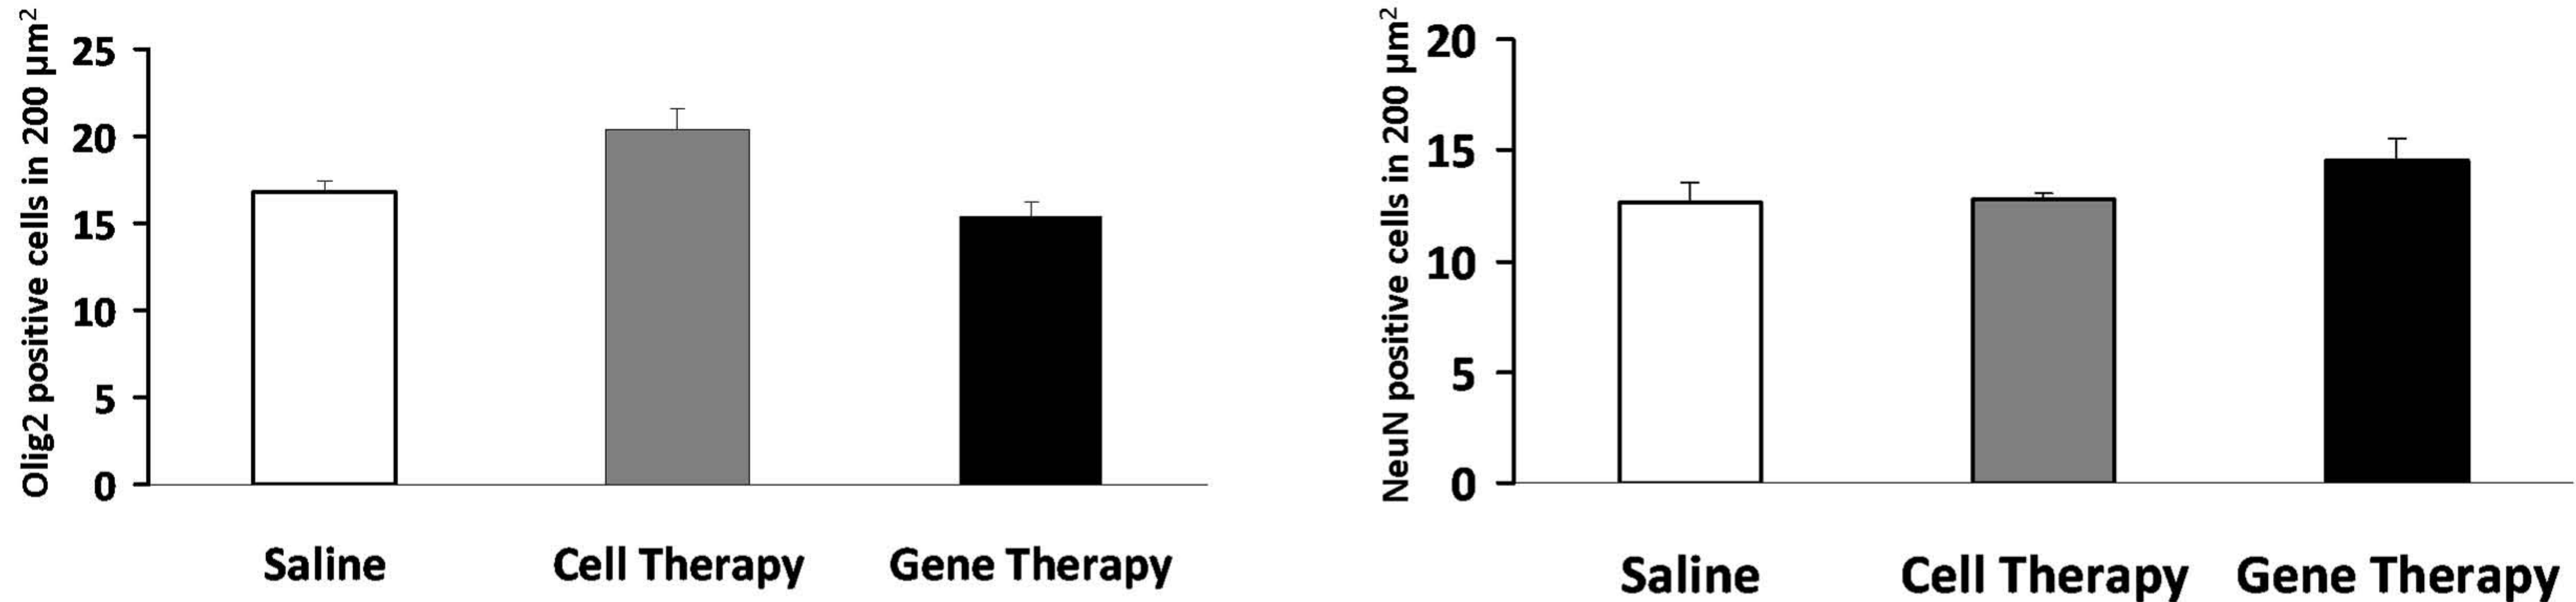

### B) Histopathological analysis after therapies in CP-EAE mice (allogeneic transplants)

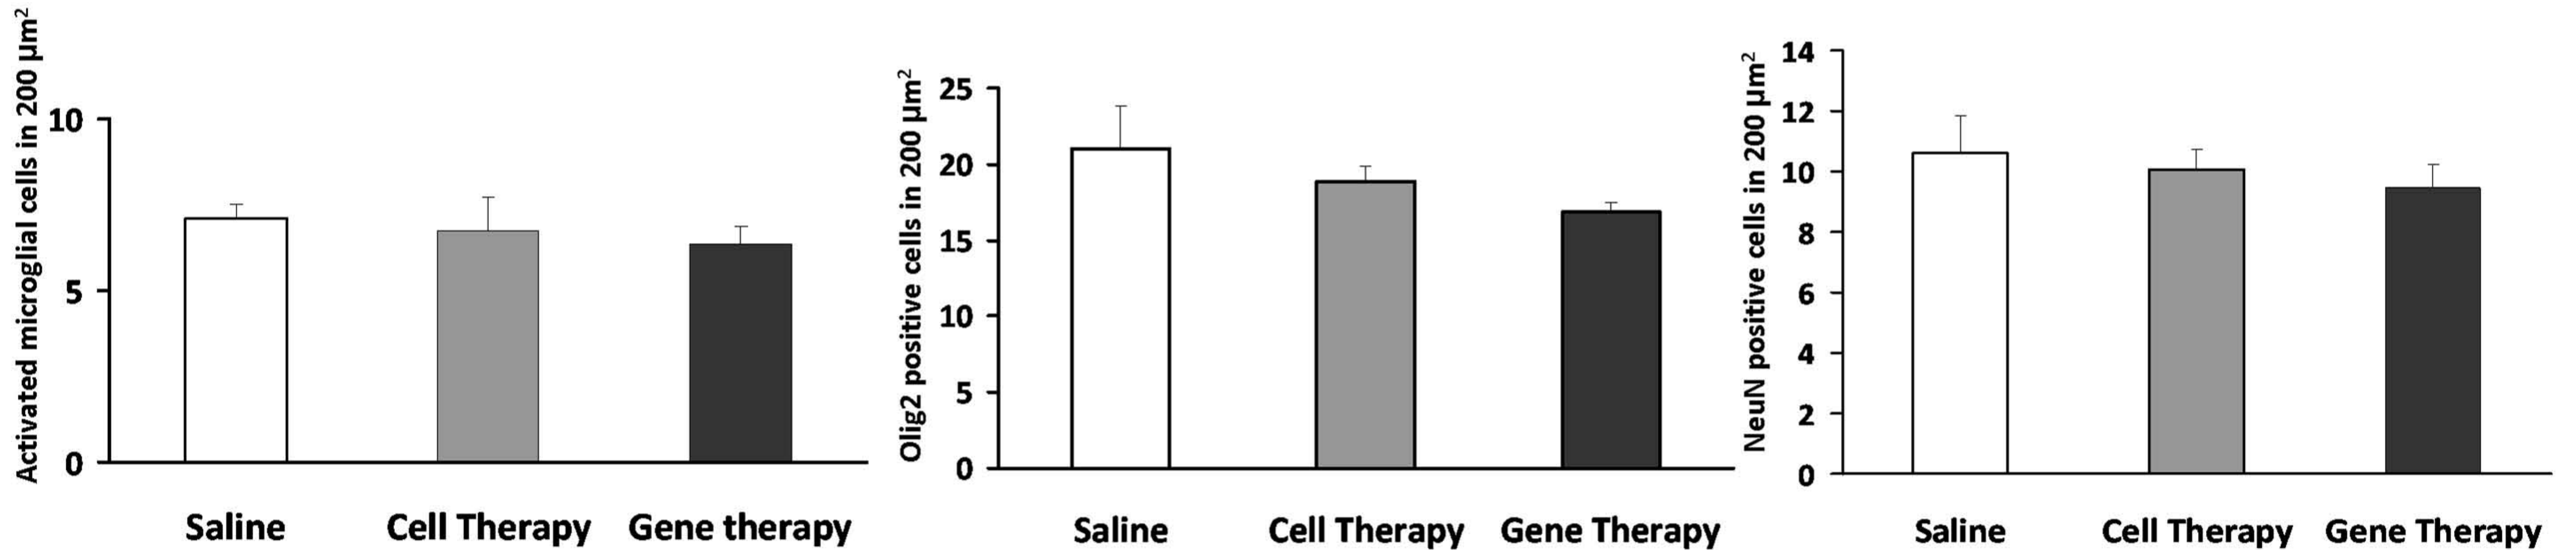

Supplement: BPH-174-238-s004.pdf [file BPH-174-238-s004.pdf]
