# Supplementary material
Source: PubMed Central journal article supplement (PMC5241389)
Supplement: BPH-174-238-s005.pdf [file BPH-174-238-s005.pdf]

## SUPPLEMENTARY MATERIAL

### FIGURE LEYENDS:

**Figure S1: A) Images of the AdMSCs and AdMSCs-IFN $\beta$  (1Hit, 2 Hits, 3Hits) cultures showing the morphology of the cell populations.** Images from passages 6 (P6) to 10 (P10) show that all plastic adherent cell lines have a fibroblastic morphology and expand primarily over the surface of culture dishes (original magnification 10X). **B) Doubling times of the AdMSC and AdMSCs-IFN $\beta$  populations.** Comparison of the growth potential between the untransduced AdMSC and transduced AdMSC populations at passages (P) 6–10. Population doubling times (*DT*) were calculated using the Schwartz formula. Table shows the mean  $\pm$  SEM (standard error of the mean) of *DT* values obtained from the cell cultures of three replicate plates of each experimental condition per passage. Data are expressed in hours (h). **C) Expression of stromal and hematopoietic markers in the AdMSCs and AdMSCs-IFN $\beta$  populations by flow cytometry.** Graphs show the average (mean) of each CD marker expression percentage value  $\pm$  standard error of the mean at passages 6 to 10. The Mann–Whitney U test was performed to compare the expression between cell cultures. No statistically significant differences were found between groups.

**Figure S2: AdMSCs and AdMSCs-IFN $\beta$  differentiation.** Images show the cell populations at culture passages 7 (P7). Cell cultures were maintained in the growth media (Control) and stimulated to differentiation (Diff.) by incubation with the specific media. **A) Adipogenic induction.** Adipogenic phenotype was confirmed by staining cells with an Oil Red-O solution and counterstaining with hematoxylin and eosin. Adipocytes showed a high percentage of round cells with lipid vesicles occupying the cytoplasm, which is consistent with the phenotype of mature adipocytes (original magnification, 20 $\times$ ). **B) Osteogenic induction.** Osteoclast led to

dense nodules from which radiated highly elongated spindle-shaped cells, and were characterized by Alizarin Red staining, which stain cell calcium deposits (original magnification, 10×). **C) Chondrogenic induction.** Differentiated chondrocytes were positively stained by Alcian blue, specific for the glycosaminoglycans in cartilage matrix (original magnification, 10×).

**Figure S3: Analysis of the CD8<sup>+</sup> T cell splenic content. A-D)** No differences were found between groups in the percentage of CD8<sup>+</sup> T cell content respect to total splenocytes **(A, C)**, and between the different CD8<sup>+</sup> cell subsets **(B, D)**, both in RR-EAE **(A-B)** and CP-EAE mice **(C-D)**. Kruskal-Wallis test was used for the statistical analyses.

**Figure S4. Effects of Cell and Gene therapies in neurohistopathological damage in CNS. A) As autologous transplant.** Effects in Olig2 positive oligodendrocyte populations and NeuN positive neural population, in the spinal cord of RR-EAE mice at the peak of the second relapse (45 dpi). Graphs show the mean ± standard error of the mean of the number of Olig2 and NeuN positive cells in 200 μ<sup>2</sup> from 3-4 slices of 5-6 animals per experimental group. **B) As allogenic transplant.** Effects in activated microglia, Olig2 positive oligodendrocyte populations and NeuN positive neural population, in the spinal cord of CP-EAE mice at chronification period (35 dpi). Graphs show the mean ± standard error of the mean of the number of activated microglial cells, Olig2 and NeuN positive cells in 200 μ<sup>2</sup> from 3 slices of 5-6 animals per experimental group. Kruskal-Wallis test was used for the statistical analyses.
