# Supplementary material
Source: PubMed Central journal article supplement (PMC5241389)

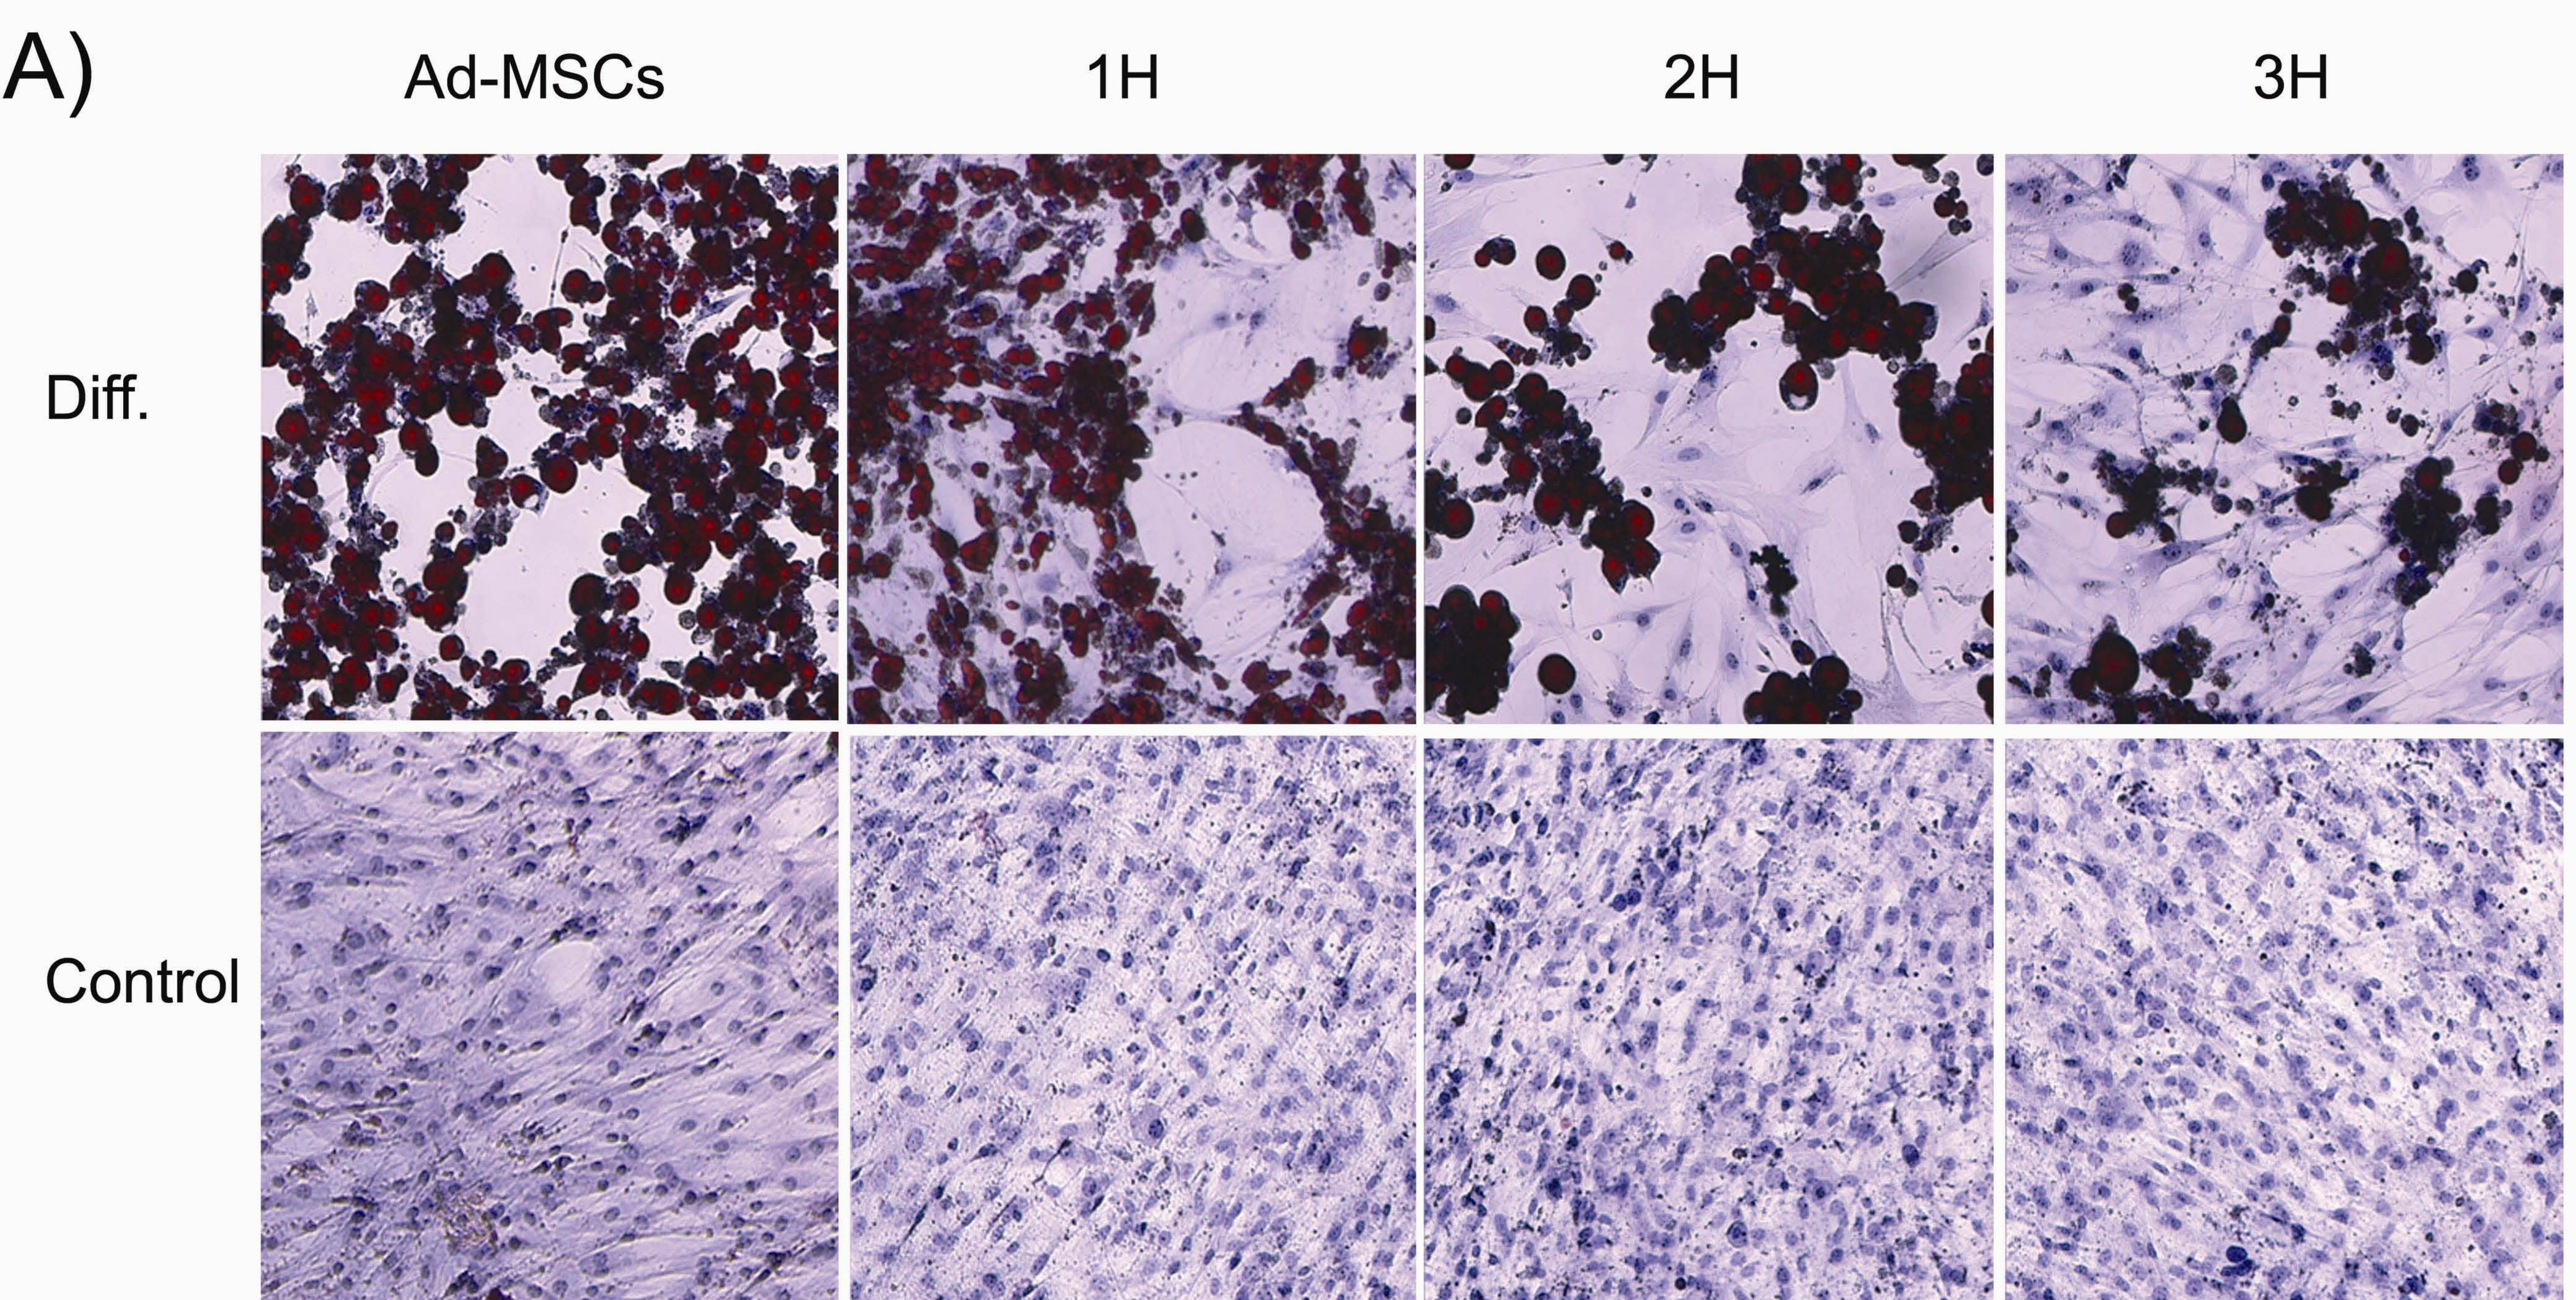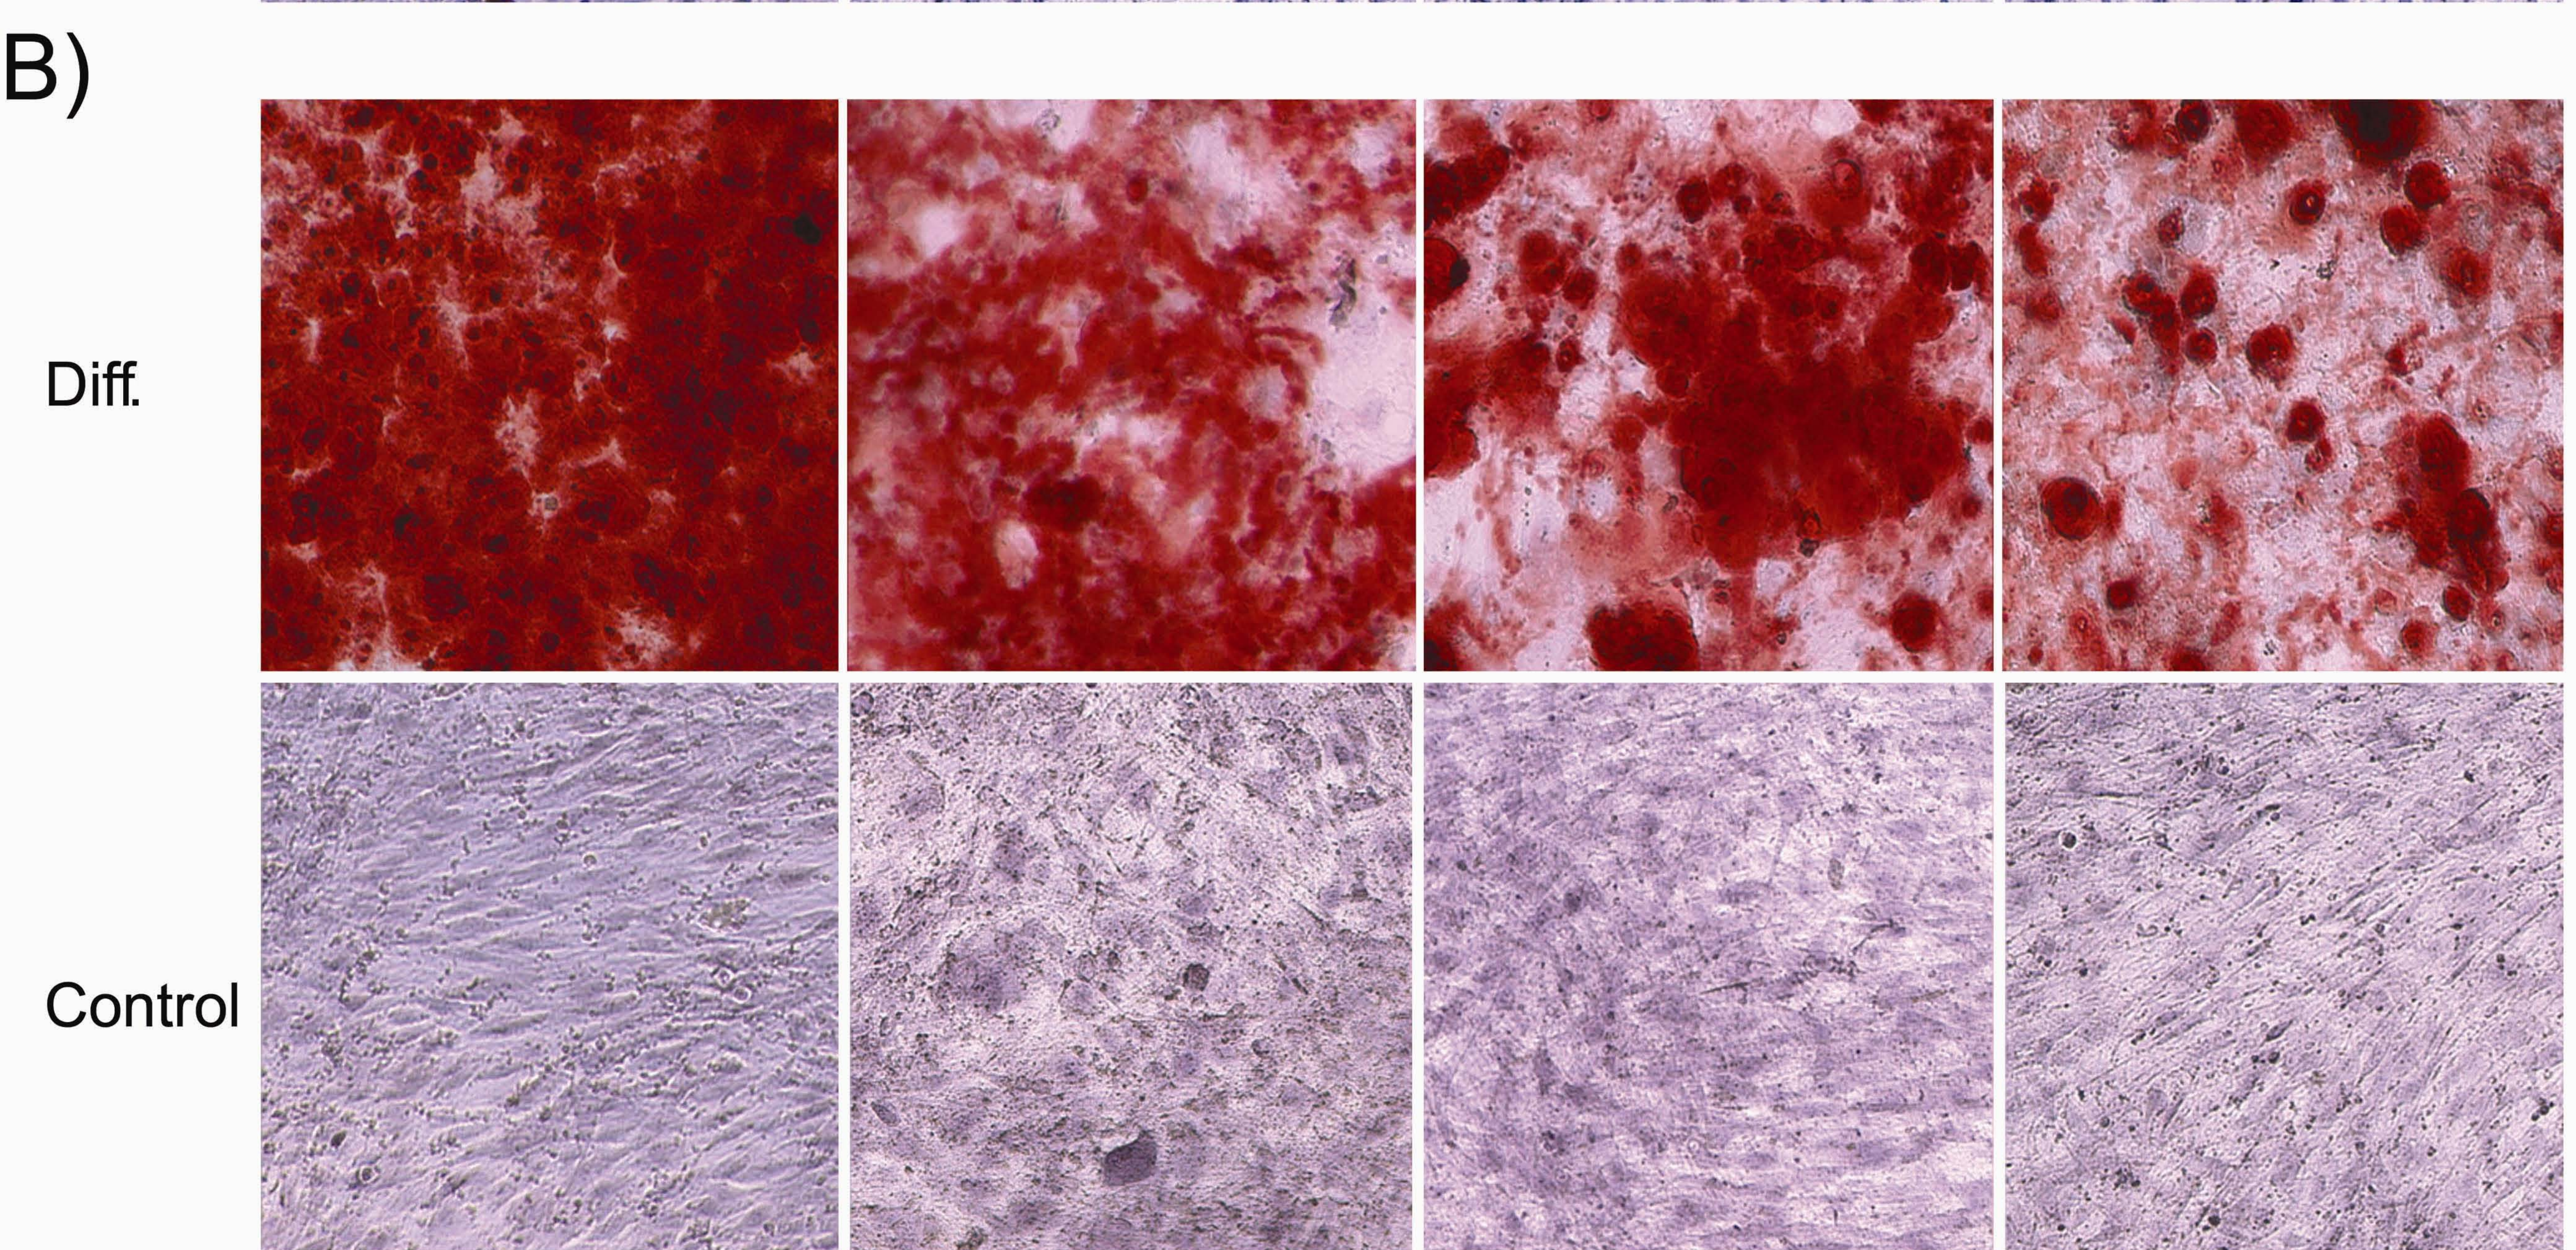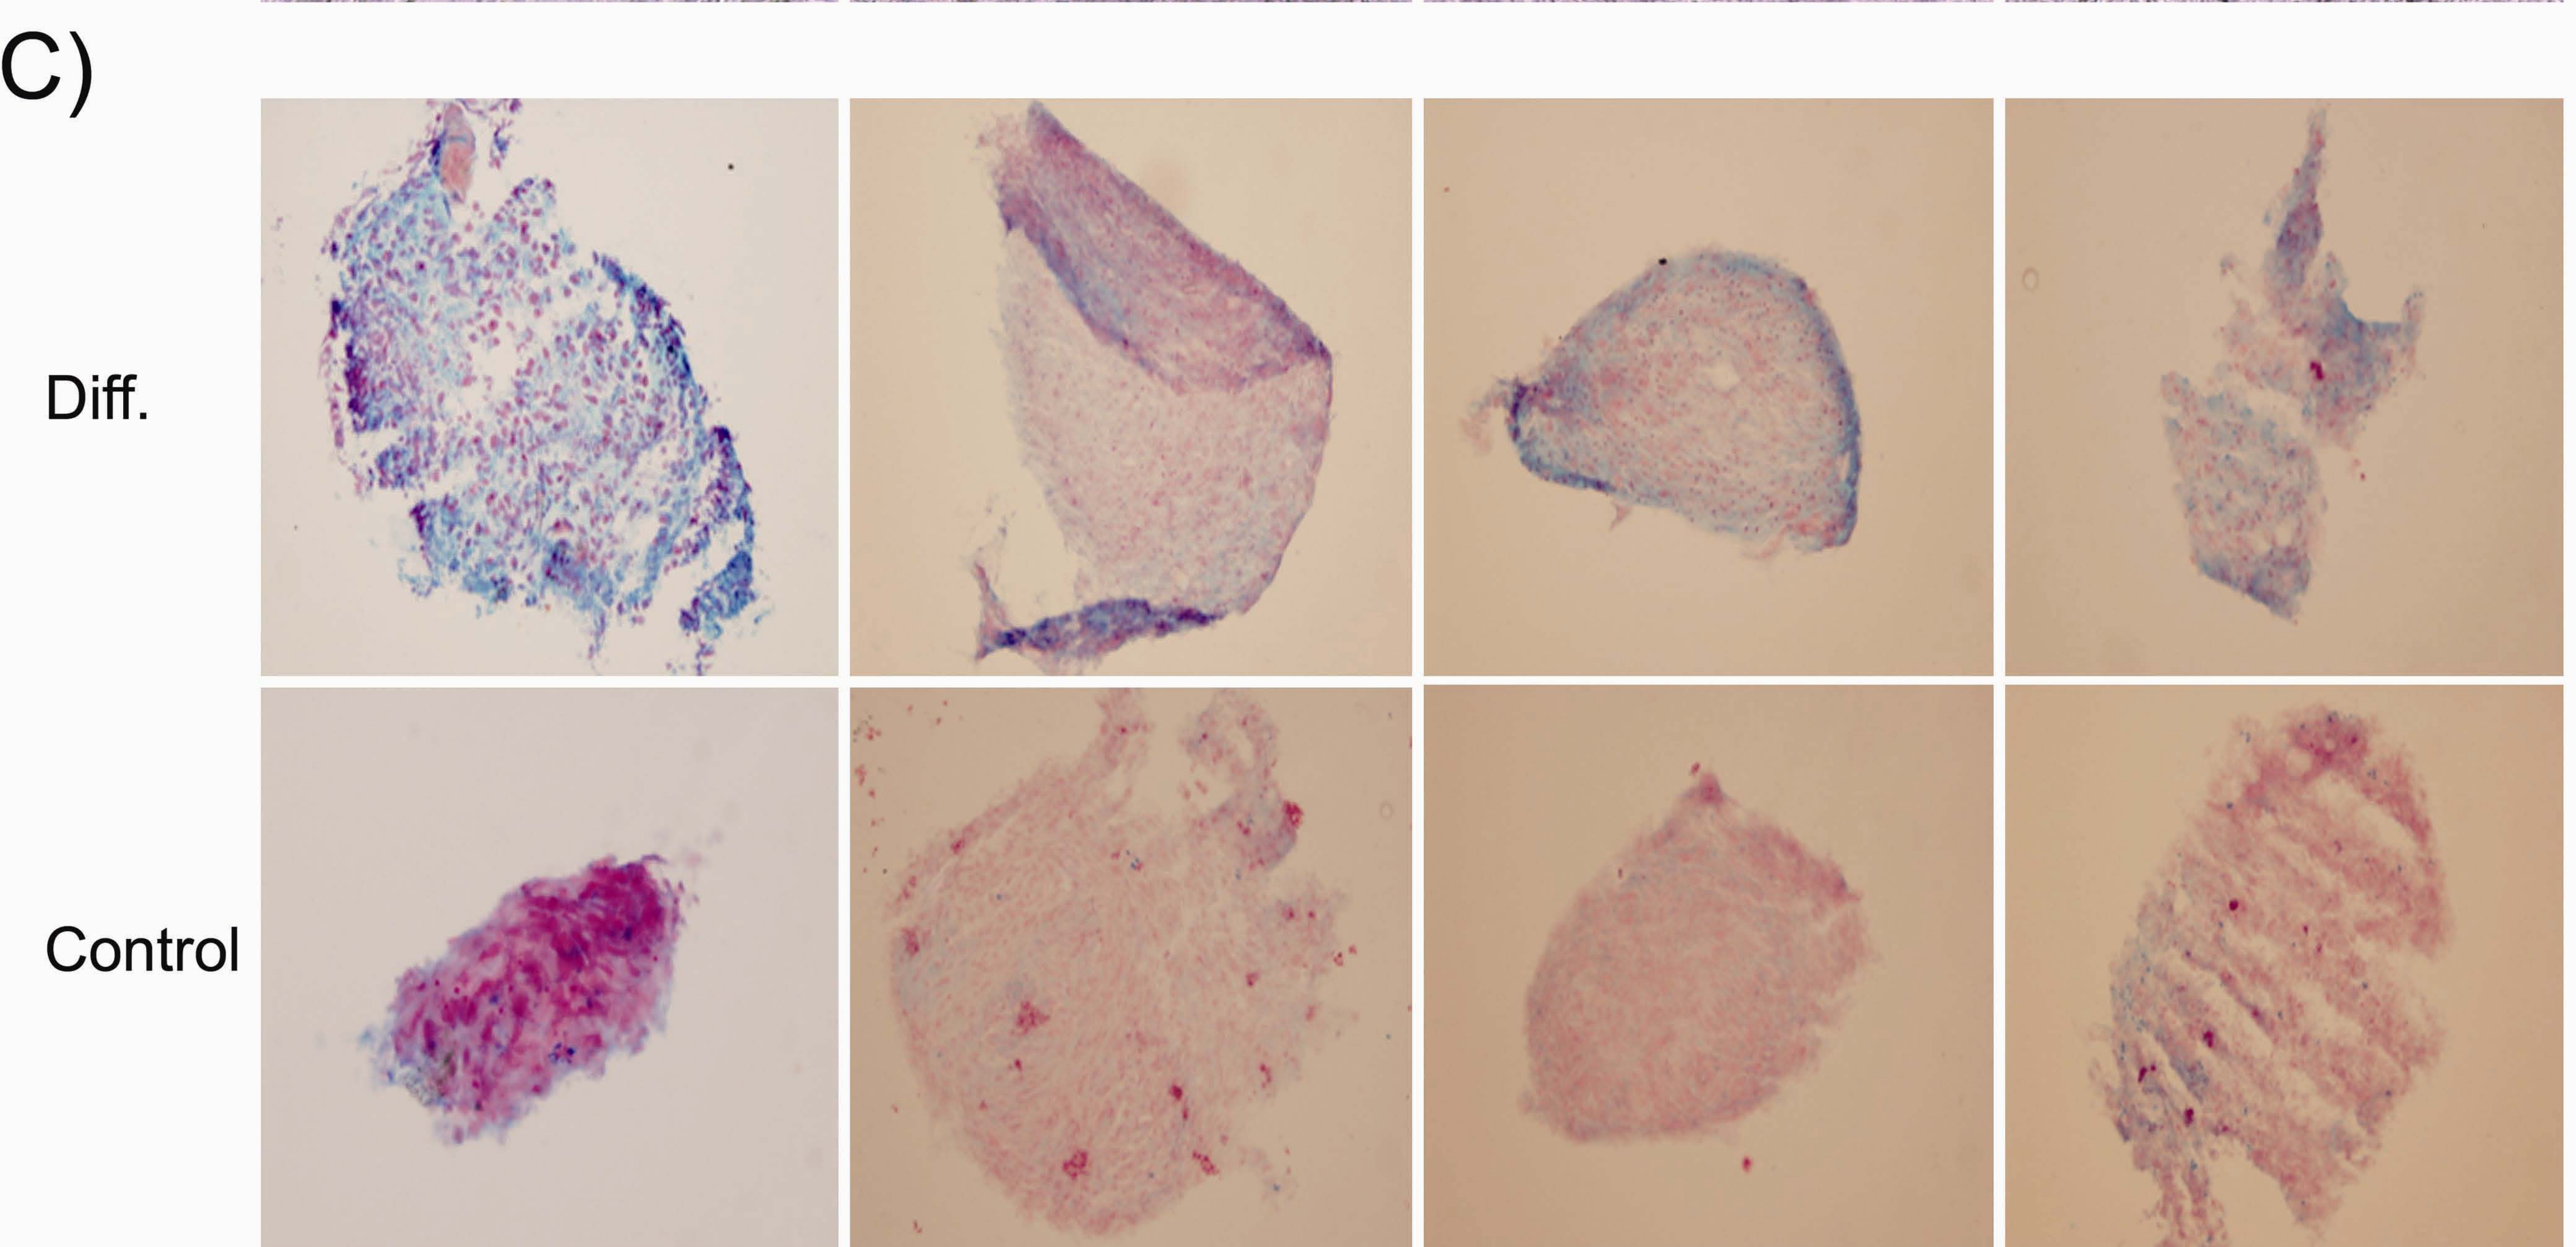

Supplement: BPH-174-238-s002.pdf [file BPH-174-238-s002.pdf]

# RR-EAE

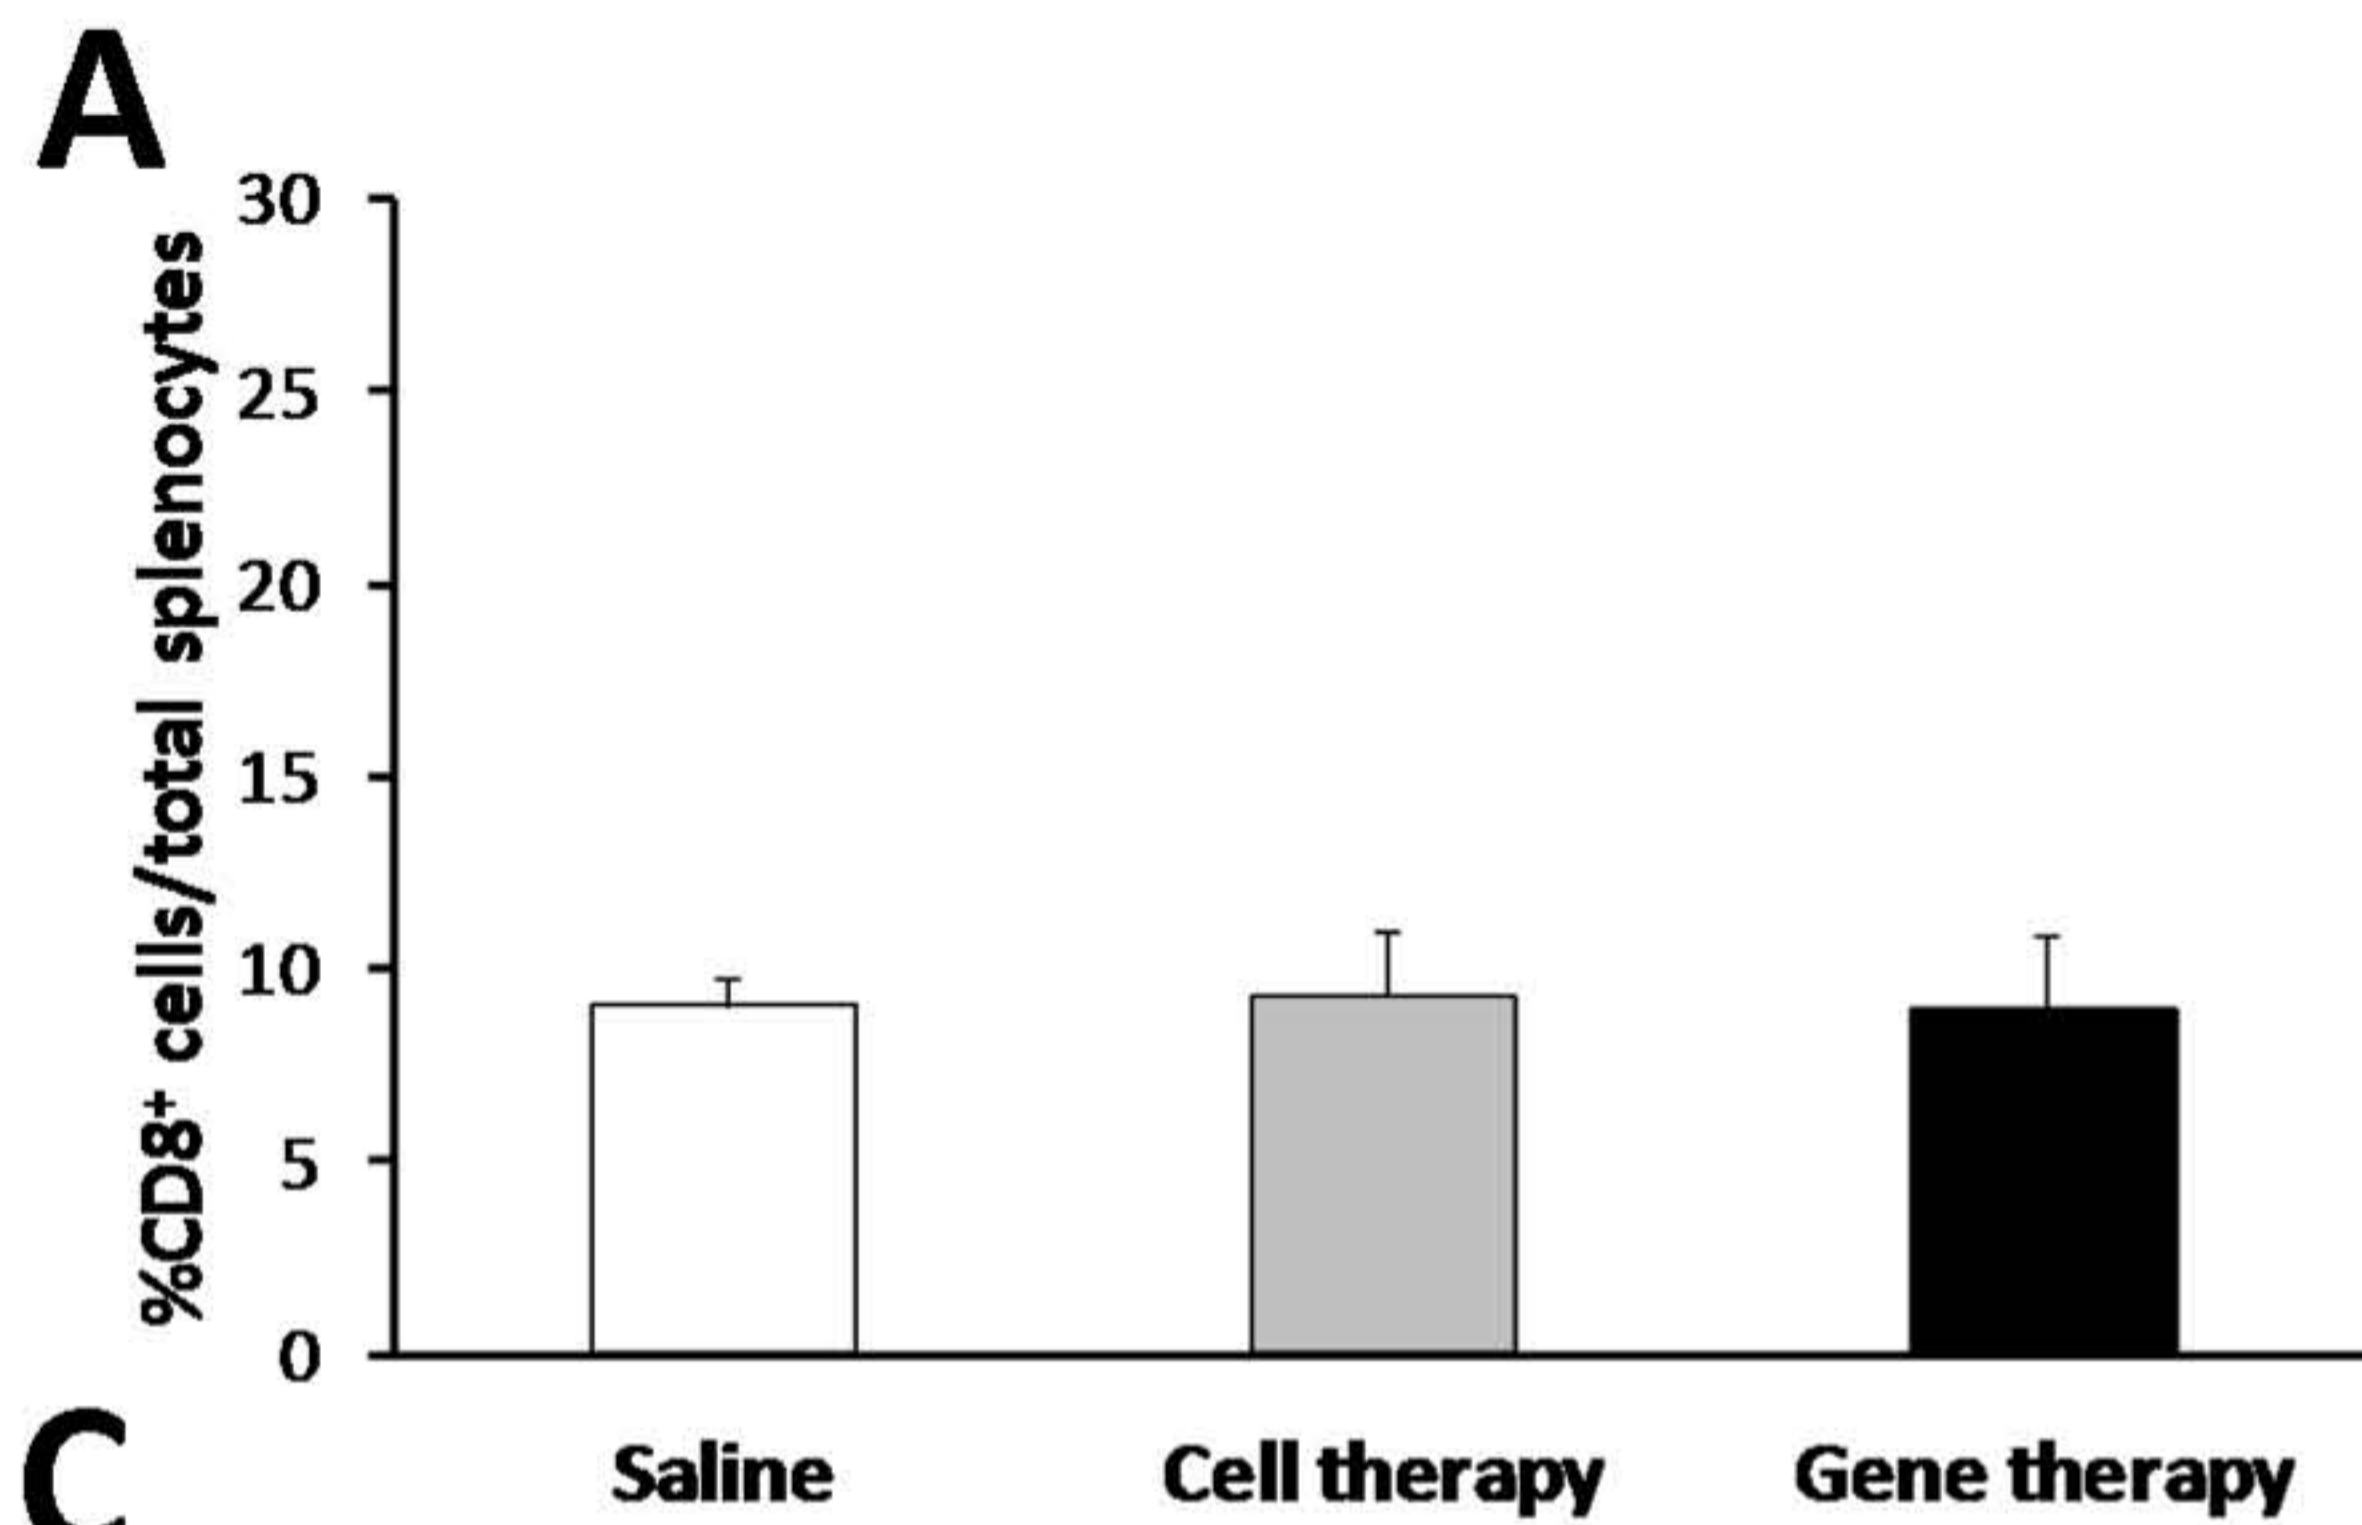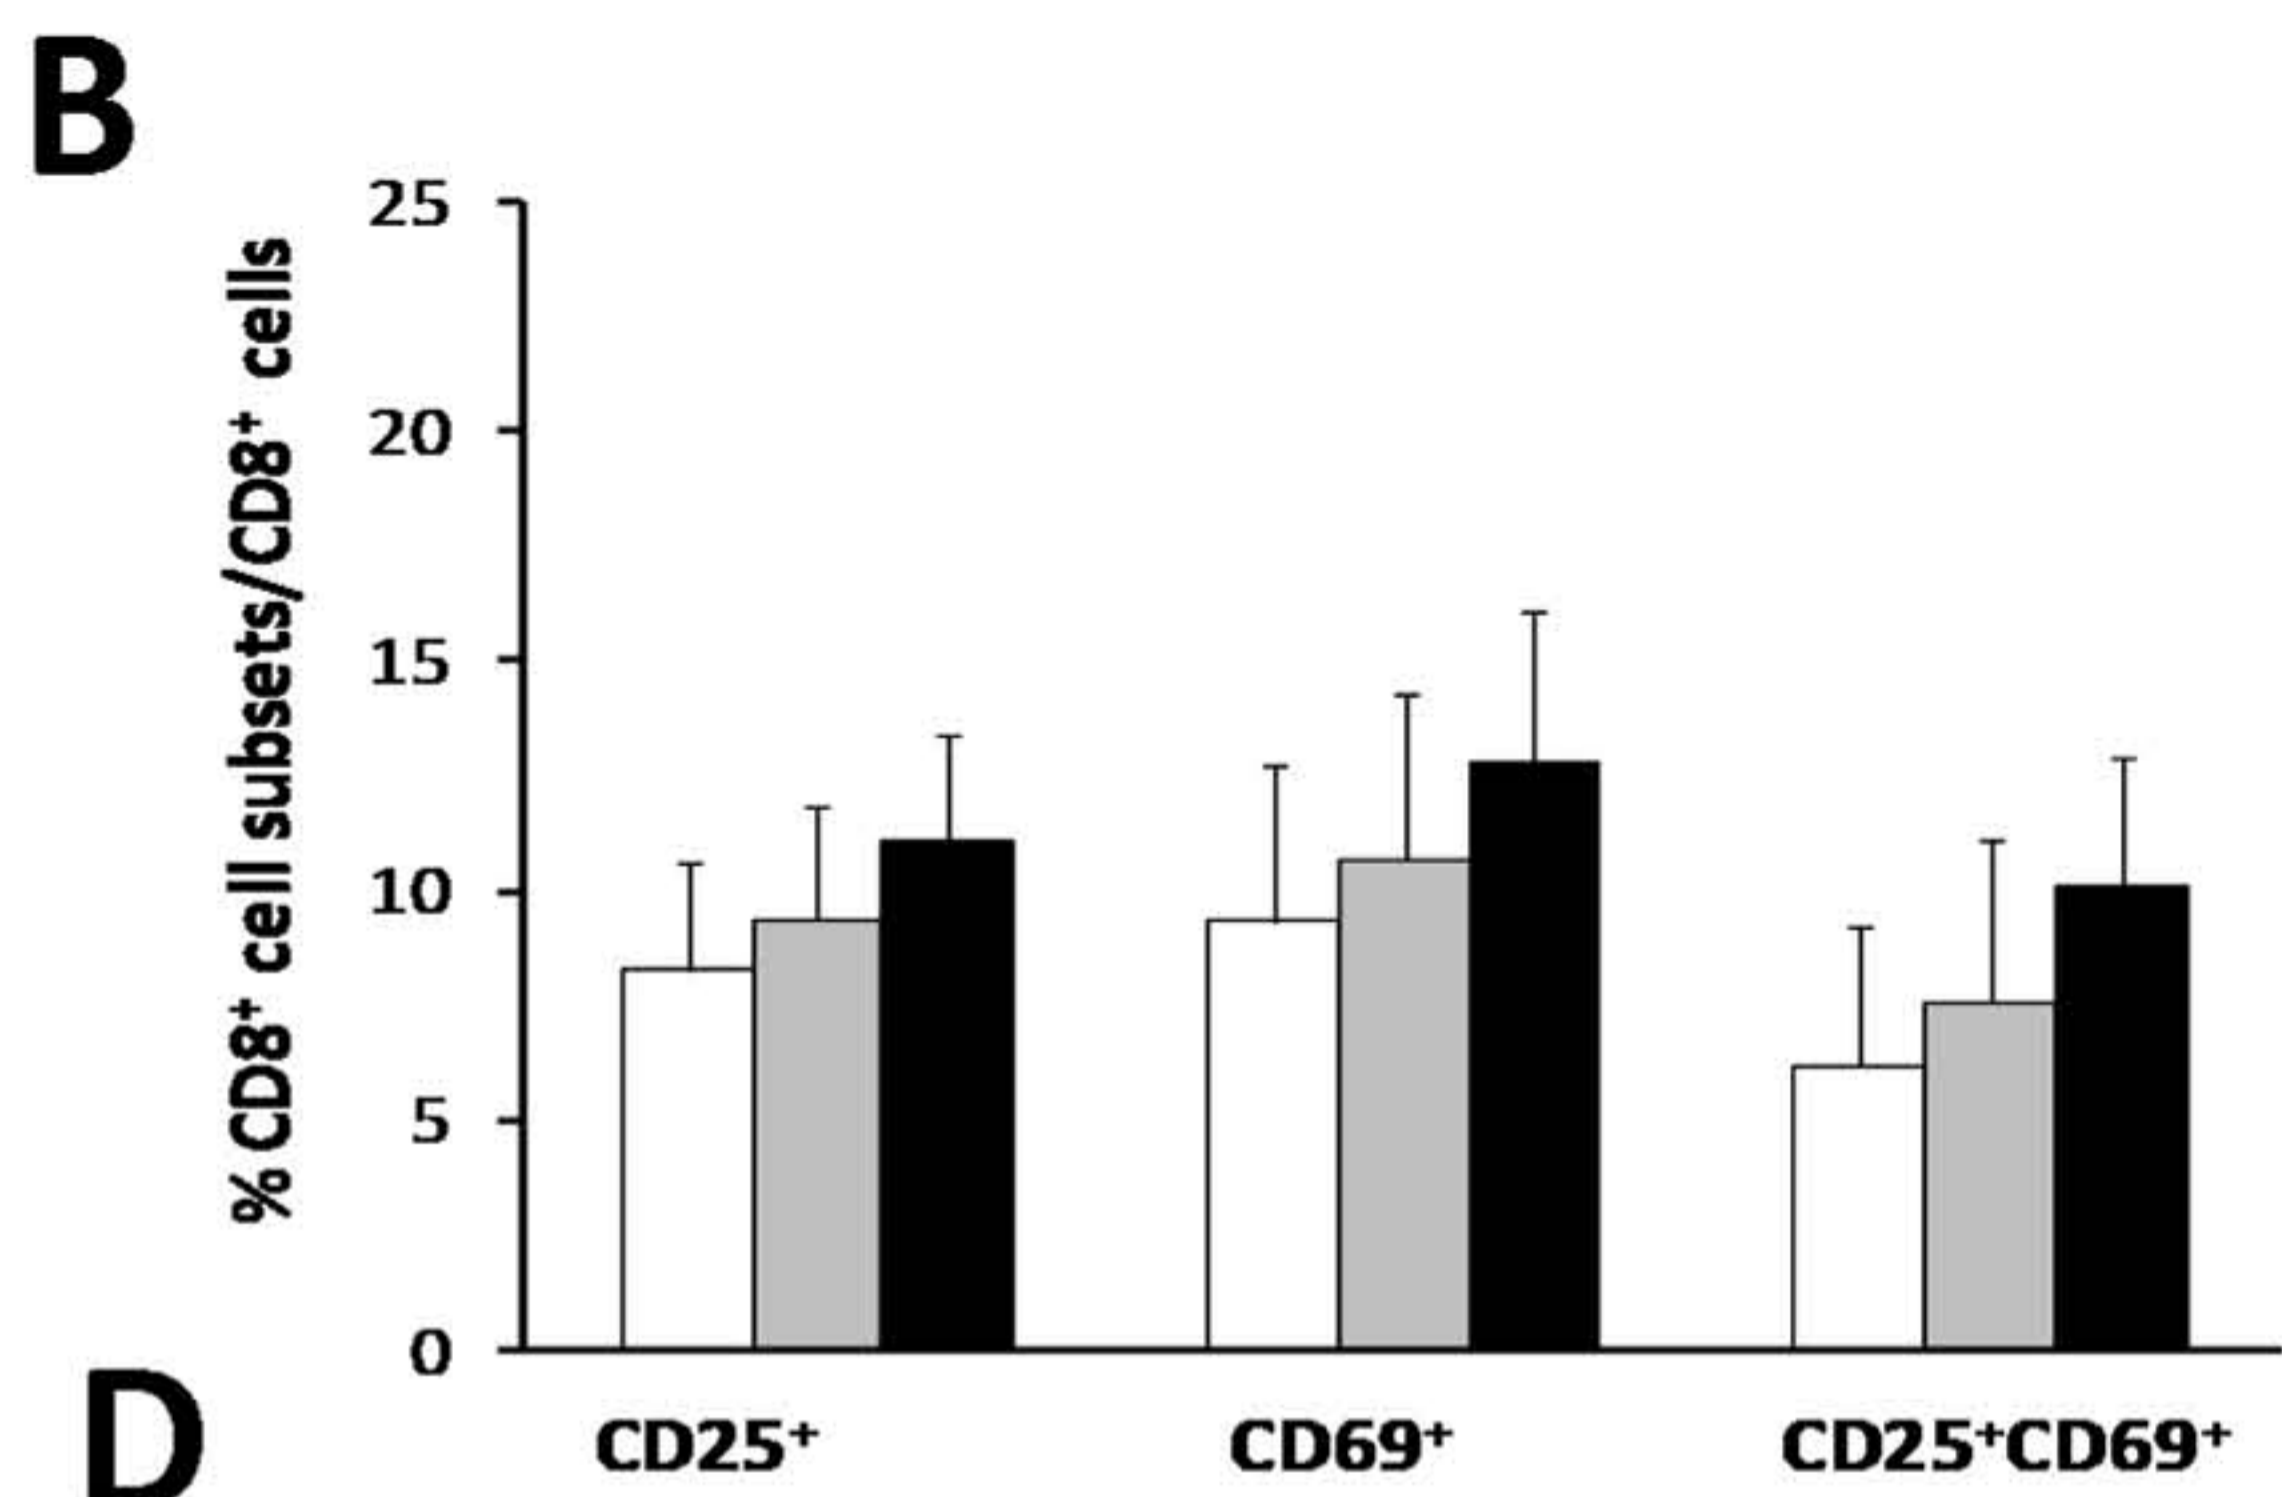

# CP-EAE

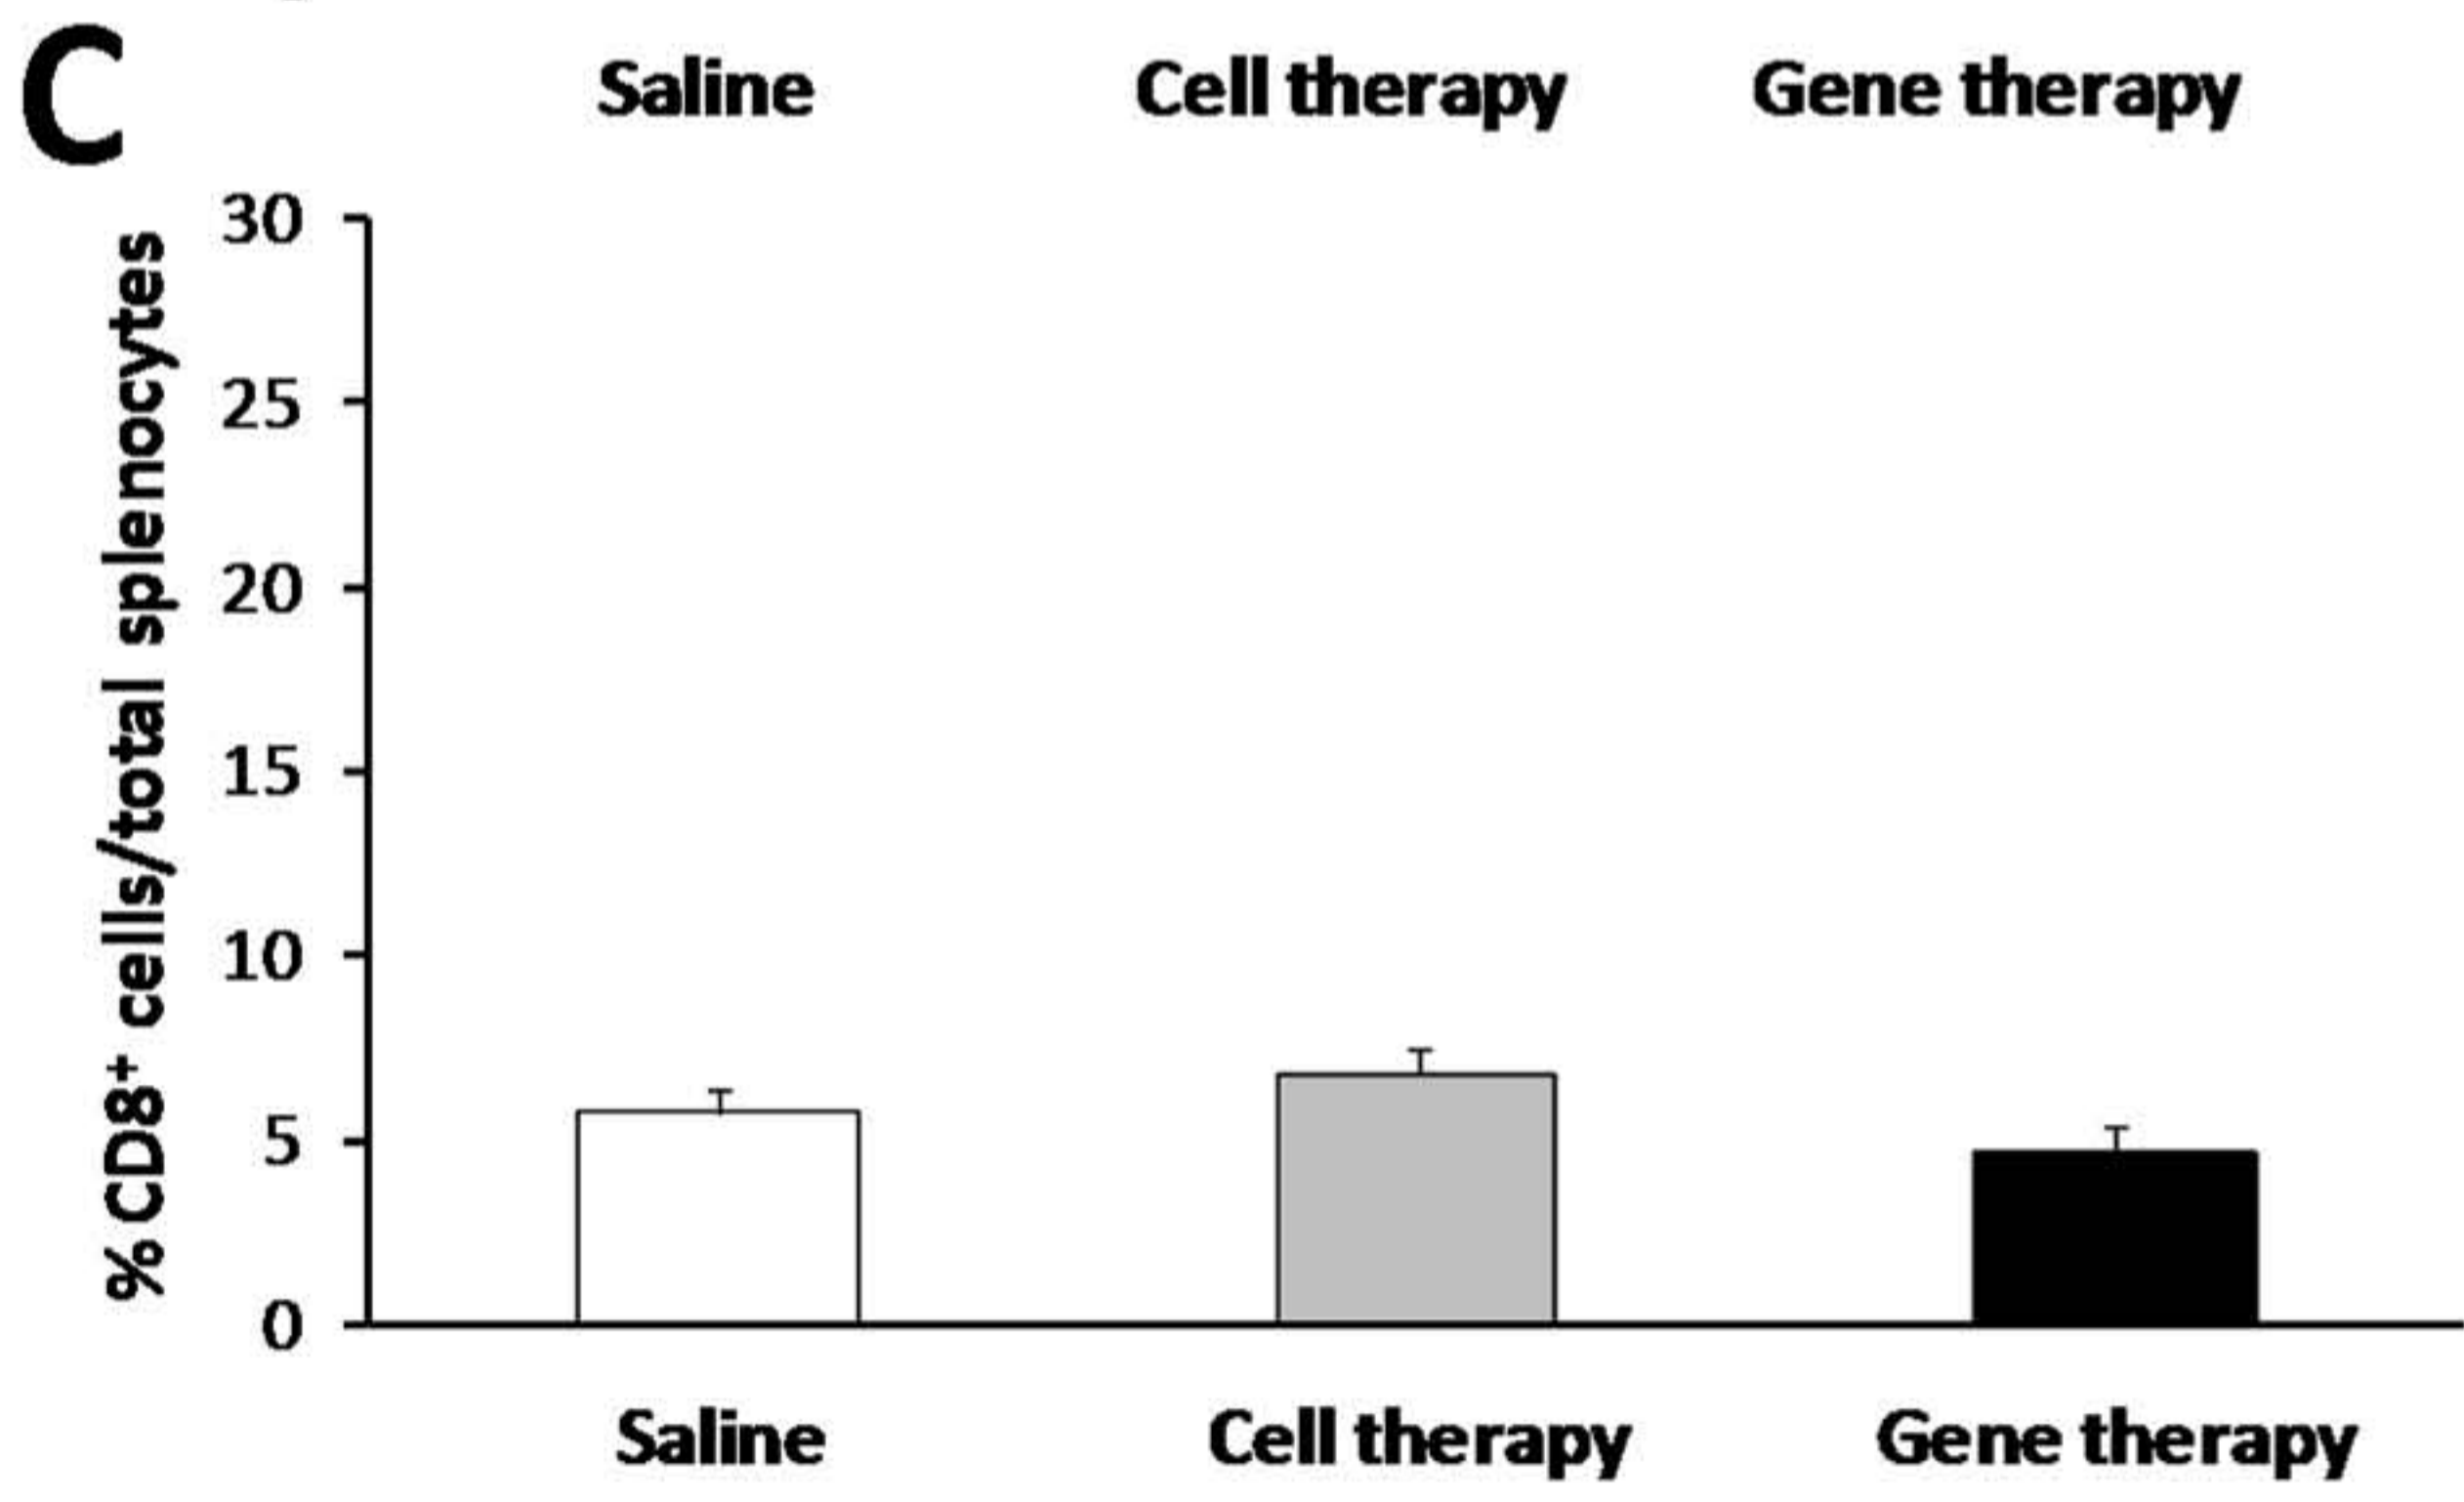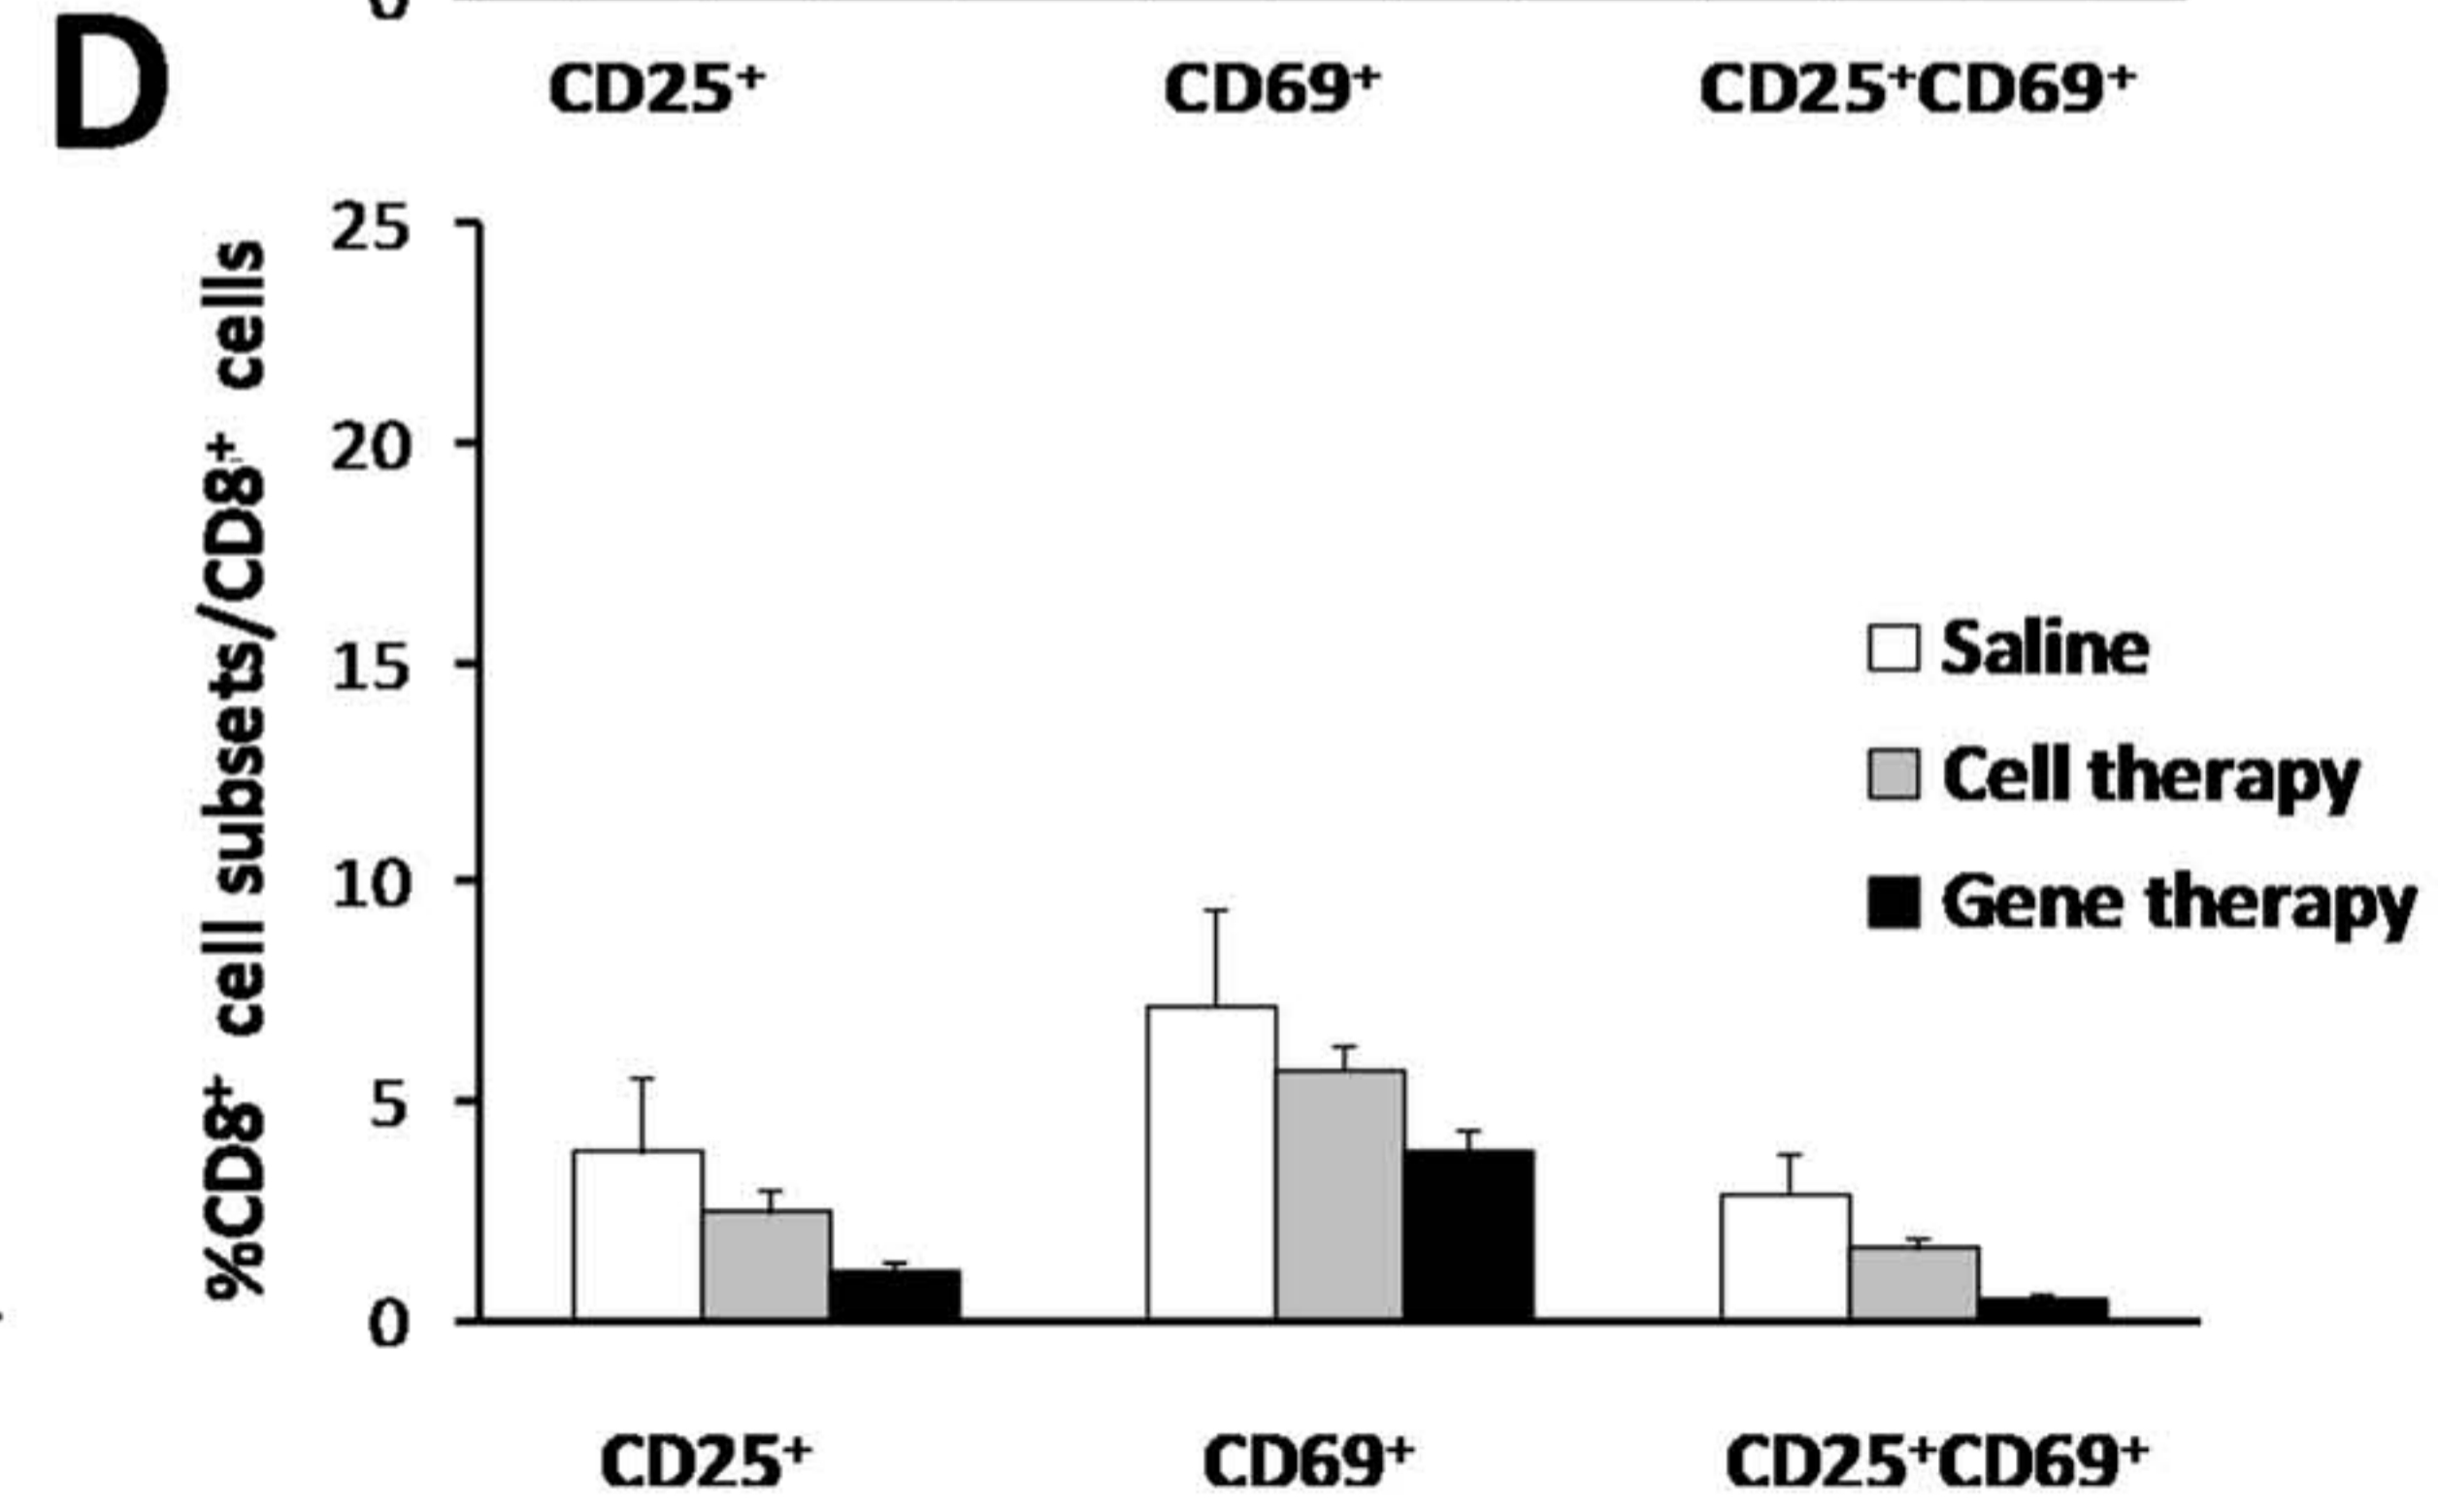

Supplement: BPH-174-238-s003.pdf [file BPH-174-238-s003.pdf]
